# Supplementary material for: A squaraine-based sensor for colorimetric detection of CO2 gas in an aqueous medium through an unexpected recognition mechanism: experiment and DFT calculation
Source: Royal Society of Chemistry journal article supplement (doi:10.1039/c7ay02218b), 2017-01-01
Supplement: c7ay02218b1.pdf [file c7ay02218b1.pdf]

Supporting Information

**A squaraine-based sensor for colorimetric detection of CO<sub>2</sub> gas in aqueous medium through an unexpected recognition mechanism**

Jianqi Sun<sup>‡a,b</sup>, Xiangjuan Zheng<sup>‡a</sup>, Xinjie Wu<sup>a</sup>, Dong Li<sup>a</sup>, Guomin Xia<sup>a</sup>, Shuxian Yu<sup>a</sup>, Qiming Yu and Hongming Wang<sup>a\*</sup>

<sup>a</sup> College of Chemistry and Institute for Advanced Study, Nanchang University, Nanchang, Jiangxi 330031, China

<sup>b</sup> College of Chemistry and Environmental Engineering, Jiujiang University, Jiujiang, Jiangxi 332005, China

**Detection Limit** <sup>[1]</sup>. The detection limit was calculated on the basis of the UV-Vis titration. The UV-Vis spectrum of **SQM** (7.5 μM) in MeCN-H<sub>2</sub>O (V : V = 90 : 10) was measured 12 times, and the standard deviation of blank measurement was achieved. To gain the slope, the absorbance at 627 nm versus amount of pure CO<sub>2</sub> gas was plotted. The detection limit was calculated using the following equation:

$$\text{Detection limit} = 3\sigma/k \quad (1)$$

Where  $\sigma$  is the standard deviation of blank measurement, and  $k$  is the slope between the absorbance versus the volume of pure CO<sub>2</sub> gas ( $V_{\text{CO}_2}$ ).

**References**

[1] S. Samanta, S. Goswami, M. N. Hoque, A. Rameshm and G. Das, *Chem. Commun.*, 2014, **50**, 11833.

---

<sup>‡</sup>These authors contributed equally to this work.

### Captions:

**Fig. S1** UV-Vis spectral changes obtained during the course of titrating sensor **SQM** (7.5  $\mu\text{M}$ ) with 50-fold weak base EA, DEA, TEA and Py in MeCN respectively.

**Fig. S2** UV-Vis spectral changes obtained during the course of titrating sensor **SQM** (7.5  $\mu\text{M}$ ) with DBU in MeCN. Inset: The corresponding plots of absorbance at indicated wavelengths versus additional DBU.

**Fig. S3** UV-Vis spectral changes obtained during the course of titrating sensor **SQM** (7.5  $\mu\text{M}$ ) with TMG in MeCN. Inset: The corresponding plots of absorbance at indicated wavelengths versus additional TMG.

**Fig. S4** UV-Vis spectral changes obtained during the course of titrating sensor **SQM** (7.5  $\mu\text{M}$ ) with  $[\text{NBu}_4]\text{F}$  in MeCN. Inset: The corresponding plots of absorbance at indicated wavelengths versus additional  $[\text{NBu}_4]\text{F}$ .

**Fig. S5** UV-Vis spectral changes obtained during the course of titrating sensor **SQM** (7.5  $\mu\text{M}$ ) with (a) 2-fold TBD; (b) 5-fold DBU in MeCN then bubbled with different volumes of  $\text{CO}_2$  gas in a sealed cuvette.

**Fig. S6** (a) UV-Vis spectral changes obtained during the course of titrating sensor **SQM** (7.5  $\mu\text{M}$ ) with DBU in MeCN- $\text{H}_2\text{O}$  (V : V = 90 : 10); (b) then bubbled with different volumes of  $\text{CO}_2$  gas in a sealed cuvette. Inset: The corresponding plots of absorbance at indicated wavelengths versus additional DBU or volume of  $\text{CO}_2$  gas.

**Fig. S7** UV-Vis spectrum of precursor **SQ** (7.5  $\mu\text{M}$ ) in MeCN- $\text{H}_2\text{O}$  (V : V = 90 : 10).

**Fig. S8** The absorbance of **SQM** (7.5  $\mu\text{M}$ ) at 627 nm in MeCN- $\text{H}_2\text{O}$  with different volume fractions of  $\text{H}_2\text{O}$  after addition of 20 eq TBD (the black bar) followed by bubbling 5 mL  $\text{CO}_2$  gas (the green bar) in a sealed cuvette.

**Fig. S9** The absorbance of **SQM** (7.5  $\mu\text{M}$ ) at 627 nm with the addition of TBD (20 eq) versus the volume of pure  $\text{CO}_2$  gas in MeCN- $\text{H}_2\text{O}$  (V : V = 90 : 10).

**Fig. S10** The absorbance of **SQM** (7.5  $\mu\text{M}$ ) at 627 nm with the addition of DBU (20 eq) versus the volume of pure  $\text{CO}_2$  gas in MeCN- $\text{H}_2\text{O}$  (V : V = 90 : 10).

**Fig. S11** The mass spectrometry analysis of **SQM** in MeCN with addition of TBD in positive mode.

**Fig. S12** The mass spectrometry analysis of **SQM** in MeCN- $\text{H}_2\text{O}$  (V : V = 90 : 10)

with addition of TBD in positive mode.

**Fig. S13** The mass spectrometry analysis of **SQM** in MeCN-H<sub>2</sub>O (V : V = 90 : 10) with addition of TBD followed by CO<sub>2</sub> gas in positive mode.

**Fig. S14** The mass spectrometry analysis of **SQM** in MeCN-H<sub>2</sub>O (V : V = 90 : 10) with addition of NaOH in positive mode.

**Fig. S15** The mass spectrometry analysis of **SQM** in MeCN-H<sub>2</sub>O (V : V = 90 : 10) with addition of NaOH followed by CO<sub>2</sub> gas in positive mode.

**Fig. S16** The absorbance of **SQM** (7.5 μM) at 627 nm with the addition of NaOH (300 eq) versus the volume of pure CO<sub>2</sub> gas in MeCN-H<sub>2</sub>O (V : V = 90 : 10).

**Fig. S17** The mass spectrometry analysis of **SQM** in MeCN-H<sub>2</sub>O (V : V = 90 : 10) with addition of TBD followed by CO<sub>2</sub> gas in negative mode.

**Fig. S18** Partial <sup>1</sup>H-NMR spectra obtained during the course of titrating sensor **SQM** (5.0 mM) with NaOH followed by CO<sub>2</sub> in DMSO-*d*<sub>6</sub>.

**Fig. S19** <sup>1</sup>H NMR spectrum of **SQM**

**Fig. S20** <sup>13</sup>C NMR spectrum of **SQM**

**Fig. S21** The mass spectrometry analysis of **SQM** in MeCN in positive mode.

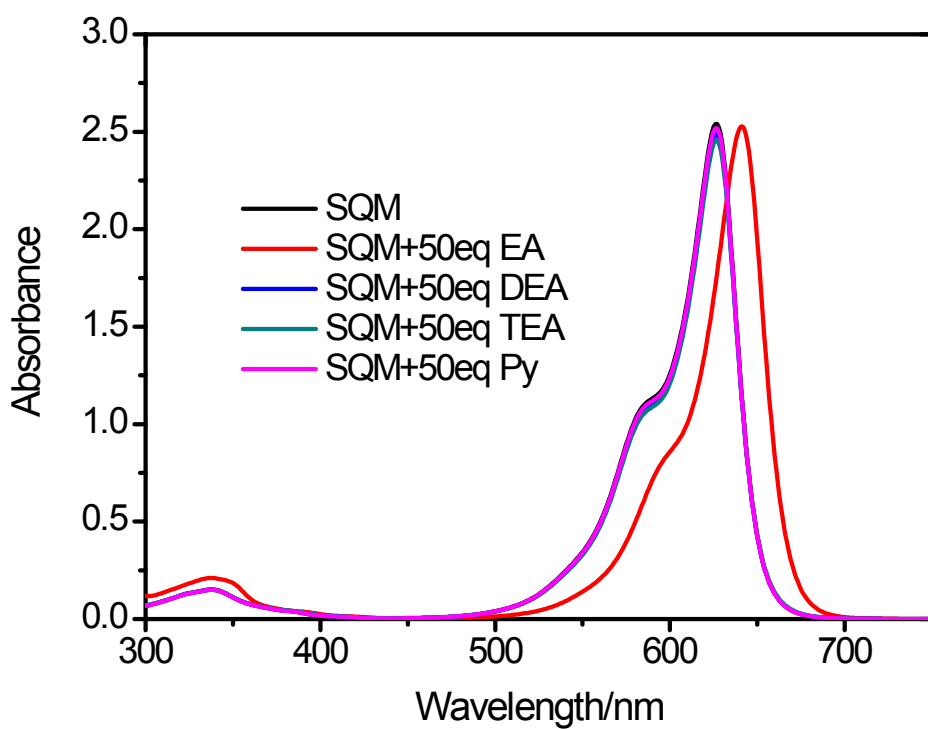

**Fig. S1** UV-Vis spectral changes obtained during the course of titrating sensor **SQM** (7.5 μM) with 50-fold weak base EA, DEA, TEA and Py in MeCN respectively.

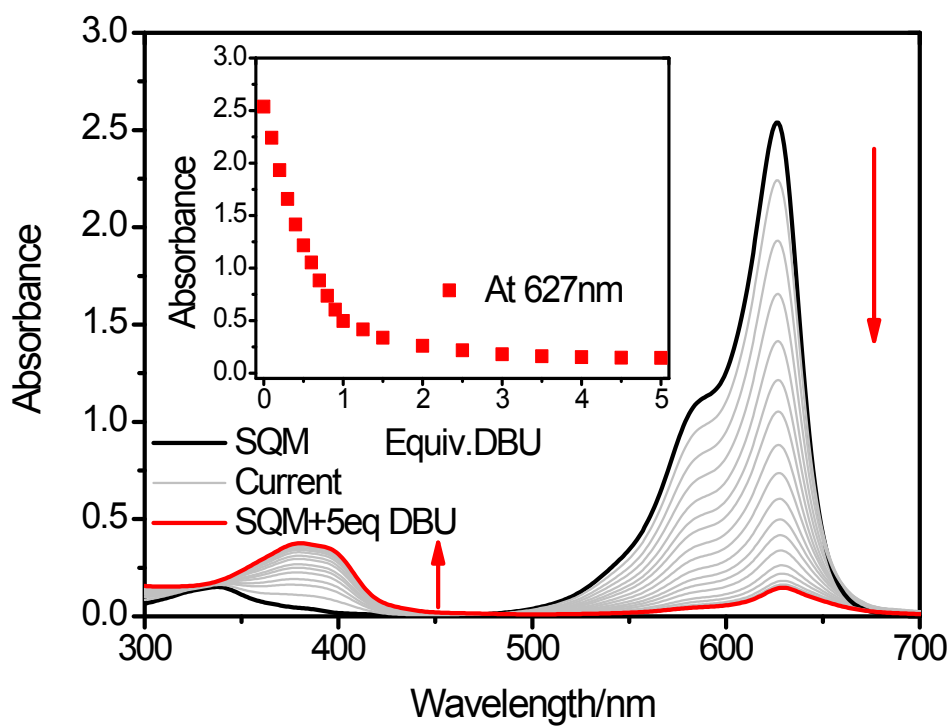

**Fig. S2** UV-Vis spectral changes obtained during the course of titrating sensor **SQM** (7.5 μM) with DBU in MeCN. Inset: The corresponding plots of absorbance at indicated wavelengths versus additional DBU.

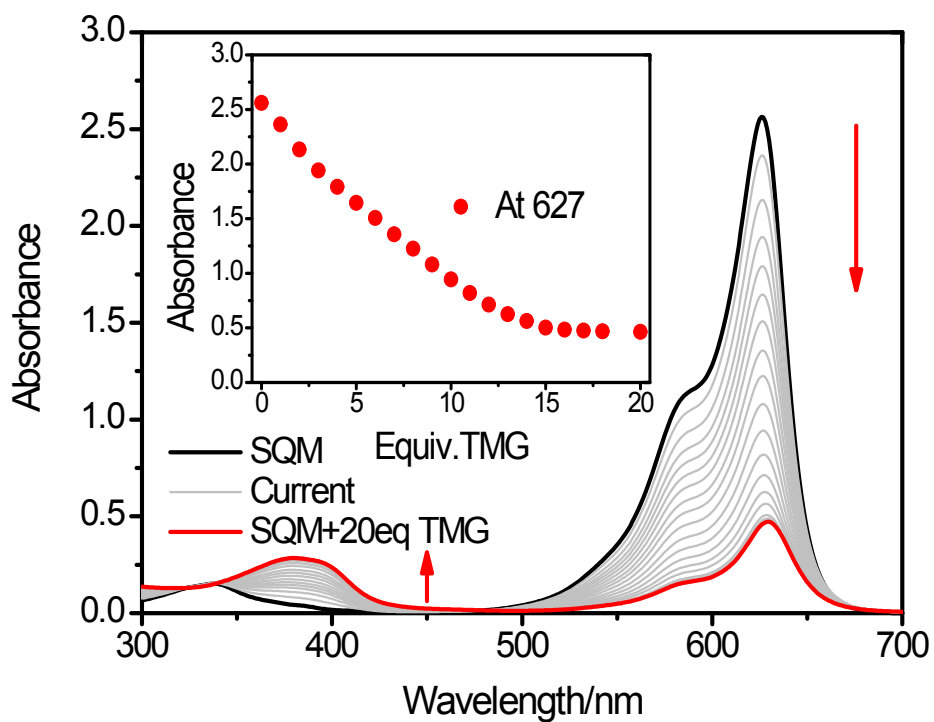

**Fig. S3** UV-Vis spectral changes obtained during the course of titrating sensor **SQM** (7.5 μM) with TMG in MeCN. Inset: The corresponding plots of absorbance at indicated wavelengths versus additional TMG.

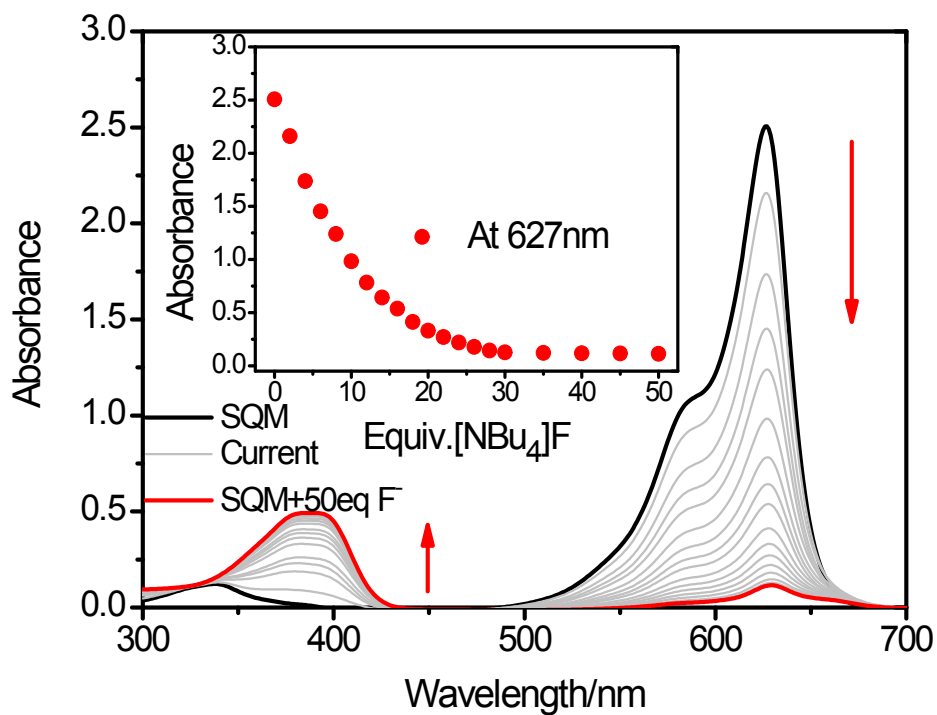

**Fig. S4** UV-Vis spectral changes obtained during the course of titrating sensor **SQM** (7.5 μM) with [NBu<sub>4</sub>]F in MeCN. Inset: The corresponding plots of absorbance at indicated wavelengths versus additional [NBu<sub>4</sub>]F.

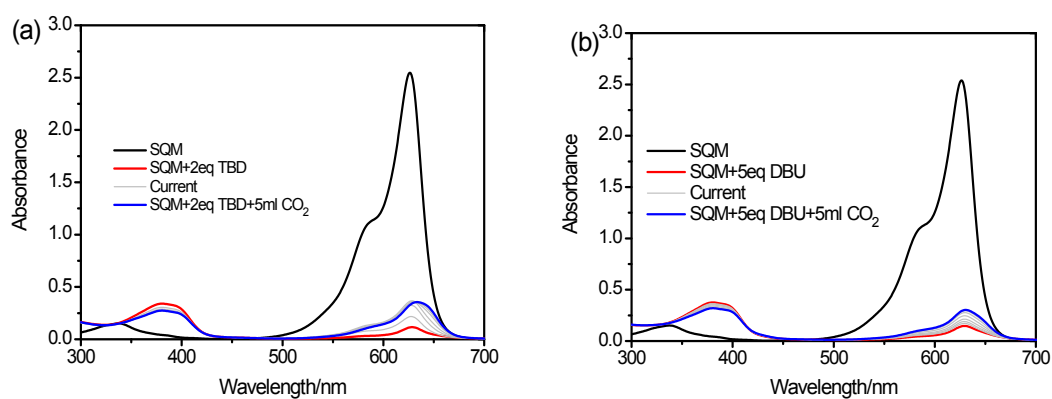

**Fig. S5** UV-Vis spectral changes obtained during the course of titrating sensor **SQM** (7.5  $\mu$ M) with (a) 2-fold TBD; (b) 5-fold DBU in MeCN then bubbled with different volumes of CO<sub>2</sub> gas in a sealed cuvette.



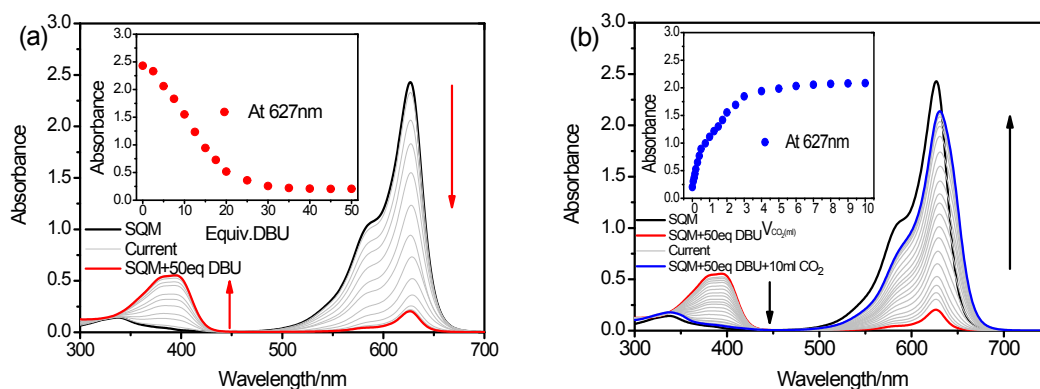

**Fig. S6** (a) UV-Vis spectral changes obtained during the course of titrating sensor **SQM** ( $7.5 \mu\text{M}$ ) with DBU in MeCN- $\text{H}_2\text{O}$  ( $V : V = 90 : 10$ ); (b) then bubbled with different volumes of  $\text{CO}_2$  gas in a sealed cuvette. Inset: The corresponding plots of absorbance at indicated wavelengths versus additional DBU or volume of  $\text{CO}_2$  gas.

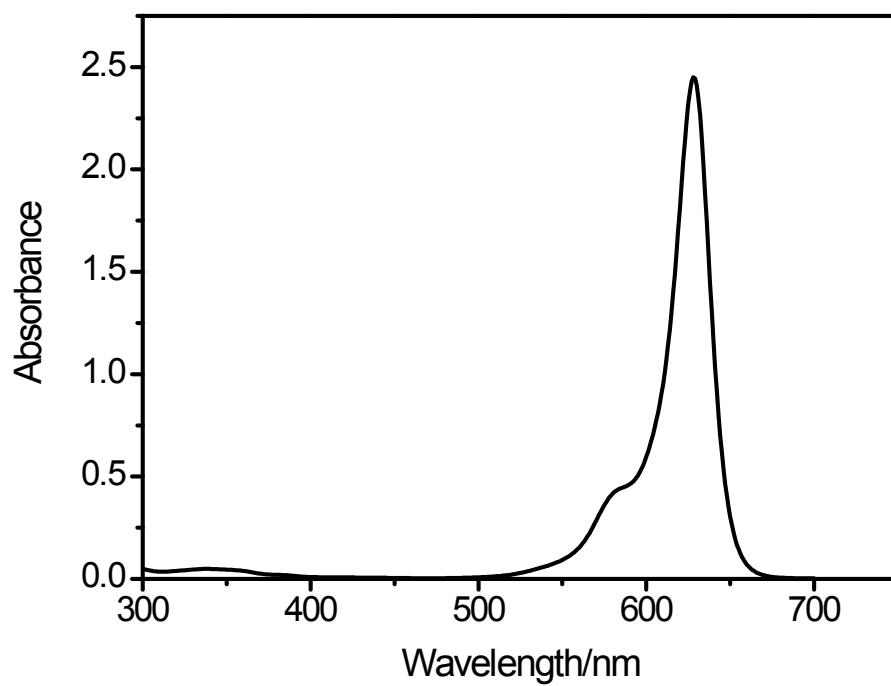

**Fig. S7** UV-Vis spectrum of precursor **SQ** (7.5  $\mu$ M) in MeCN-H<sub>2</sub>O (V : V = 90 : 10).

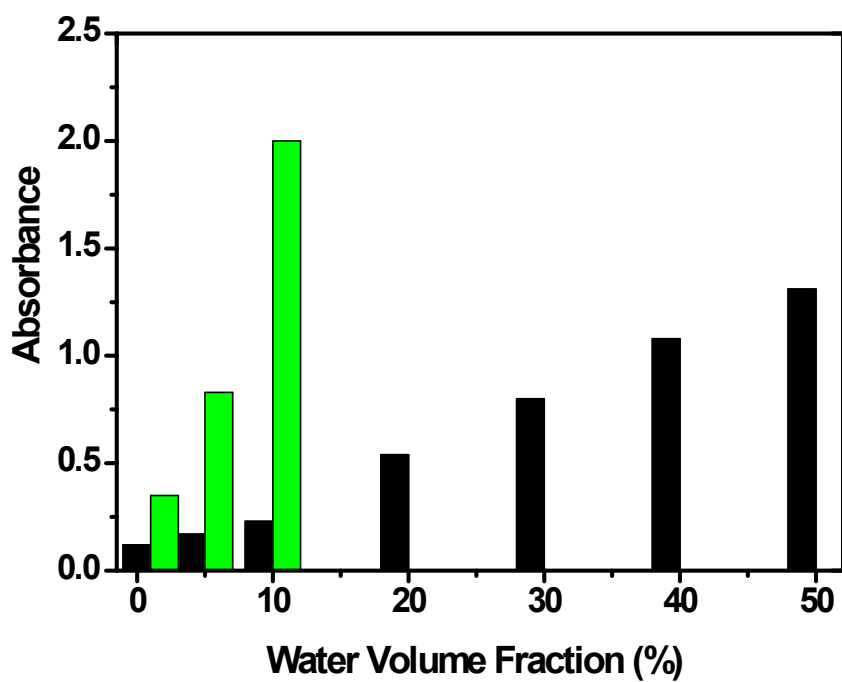

**Fig. S8** The absorbance of SQM (7.5 μM) at 627 nm in MeCN-H<sub>2</sub>O with different volume fractions of H<sub>2</sub>O after addition of 20 eq TBD (the black bar) followed by bubbling 5 mL CO<sub>2</sub> gas (the green bar) in a sealed cuvette.

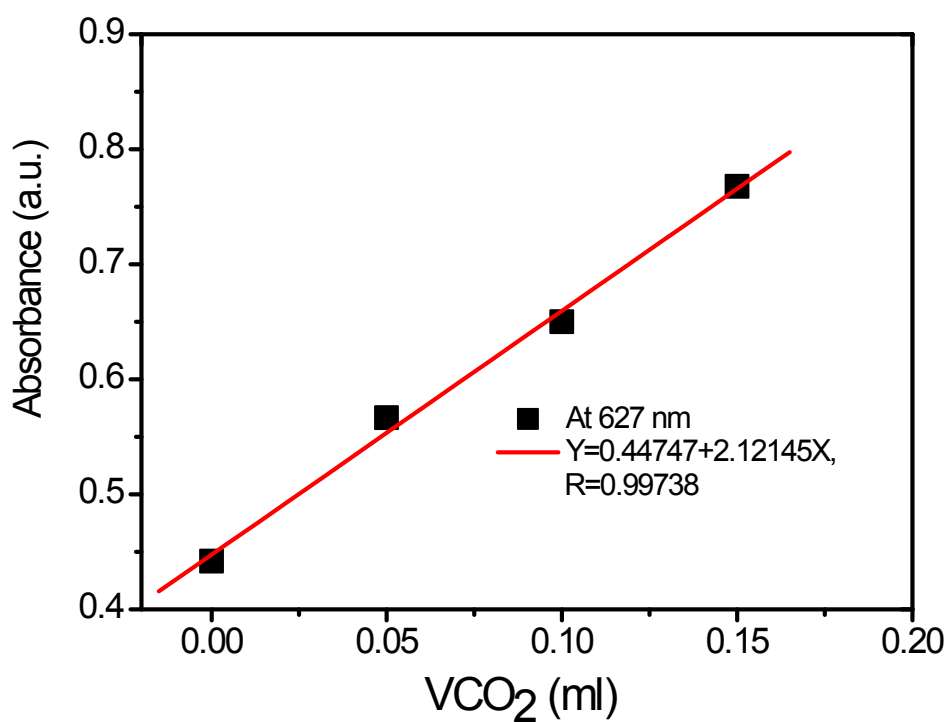

**Fig. S9** The absorbance of **SQM** (7.5  $\mu\text{M}$ ) at 627 nm with the addition of DBT (20 eq) versus the volume of pure  $\text{CO}_2$  gas in MeCN- $\text{H}_2\text{O}$  (V : V = 90 : 10).

The detection limit in MeCN- $\text{H}_2\text{O}$  (V : V = 90 : 10) (3.0 ml) was calculated to be about  $1.59 \cdot 10^{-6}$  M (ca. 39.0 ppm, 1atm, 25°C)

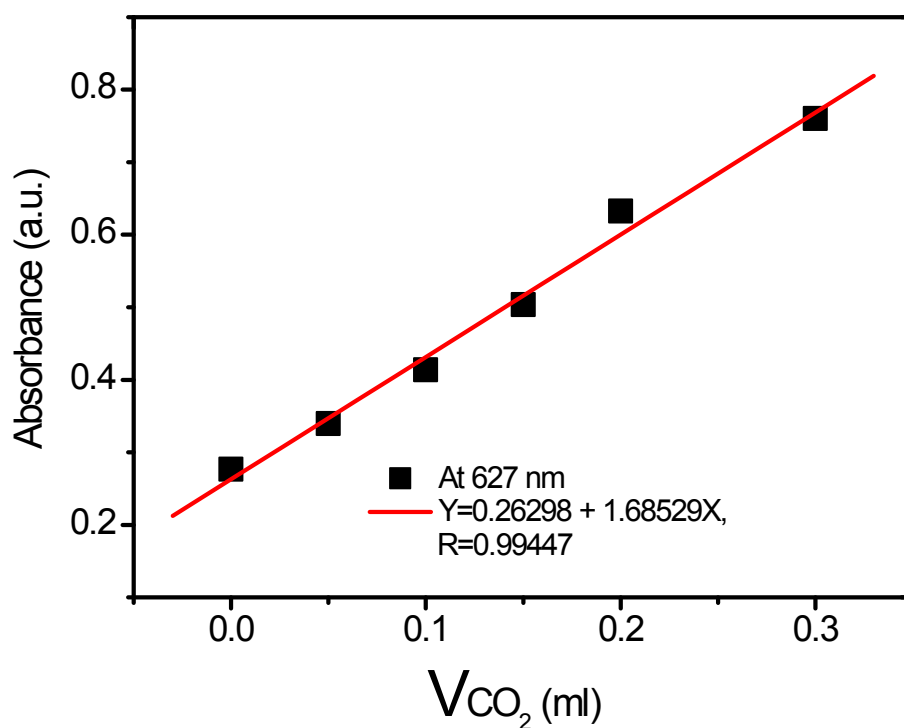

**Fig. S10** The absorbance of **SQM** (7.5  $\mu$ M) at 627 nm with the addition of DBU (20 eq) versus the volume of pure CO<sub>2</sub> gas in MeCN-H<sub>2</sub>O (V : V = 90 : 10).

The detection limit in MeCN-H<sub>2</sub>O (V : V = 90 : 10) (3.0 ml) was calculated to be about  $2.0 \times 10^{-6}$  M (ca. 49.1 ppm, 1 atm, 25°C)

SQ-OCH<sub>3</sub>+TBD #23-76 RT: 0.09-0.24 AV: 54 NL: 4.69E3  
T: ITMS + c ESI Full ms [100.00-1000.00]

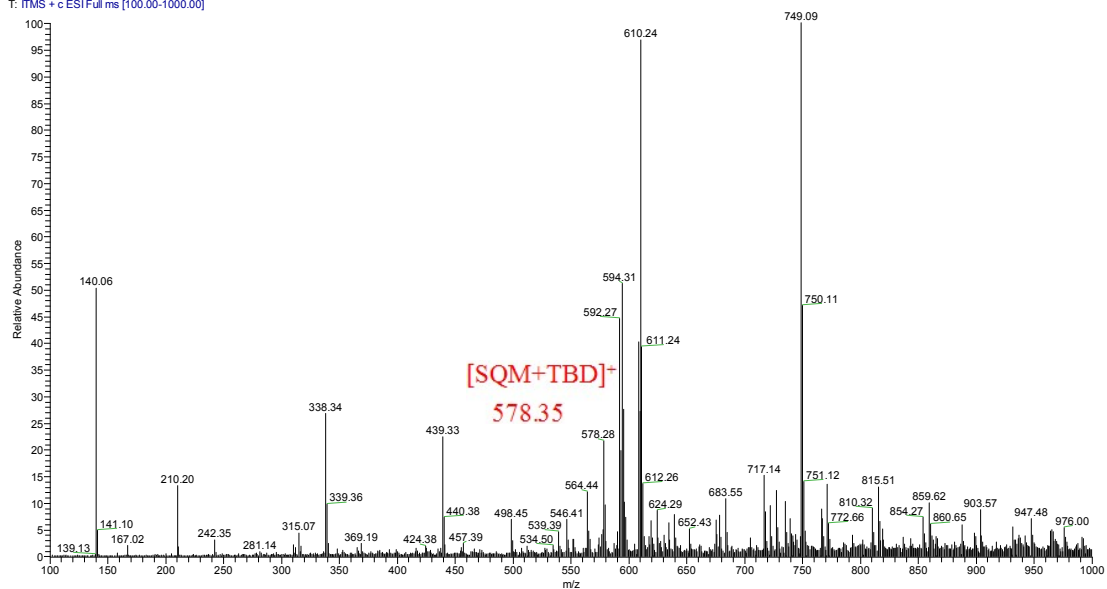

**Fig. S11** The mass spectrometry analysis of SQM with addition of TBD in MeCN in positive mode.

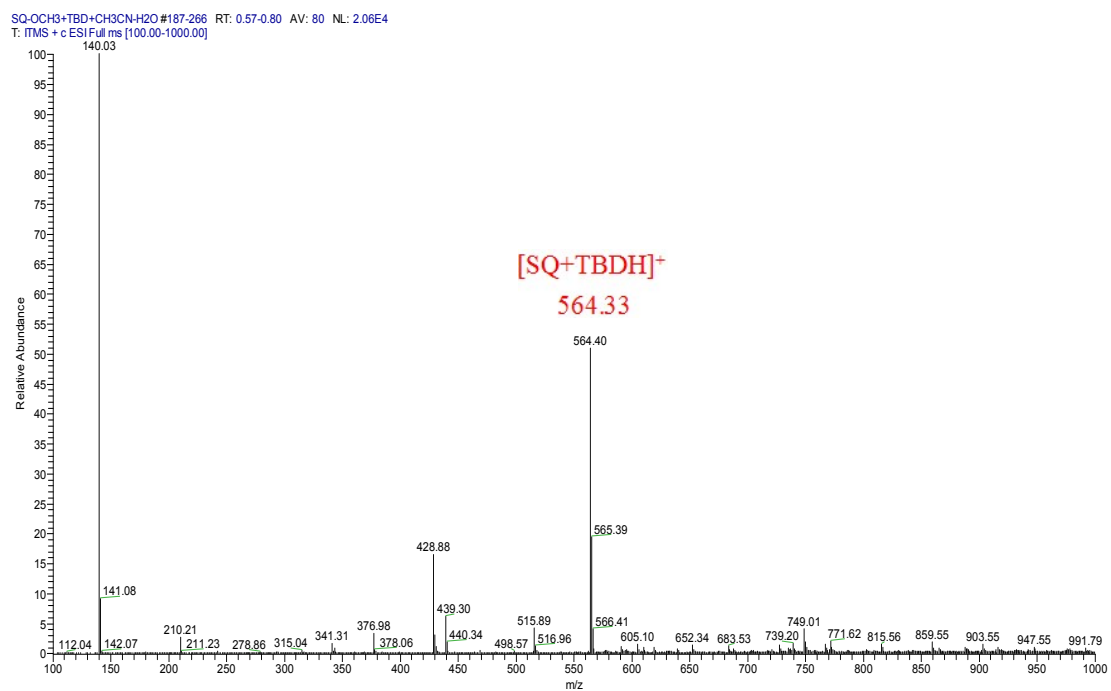

**Fig. S12** The mass spectrometry analysis of **SQM** in MeCN-H<sub>2</sub>O (V : V = 90 : 10) with addition of TBD in positive mode.

SQ-OCH3+TBD+CO2+CH3CN+H2O #75-180 RT: 0.25-0.55 AV: 106 NL: 2.91E4  
T: ITMS + cESI Full ms [100.00-1000.00]

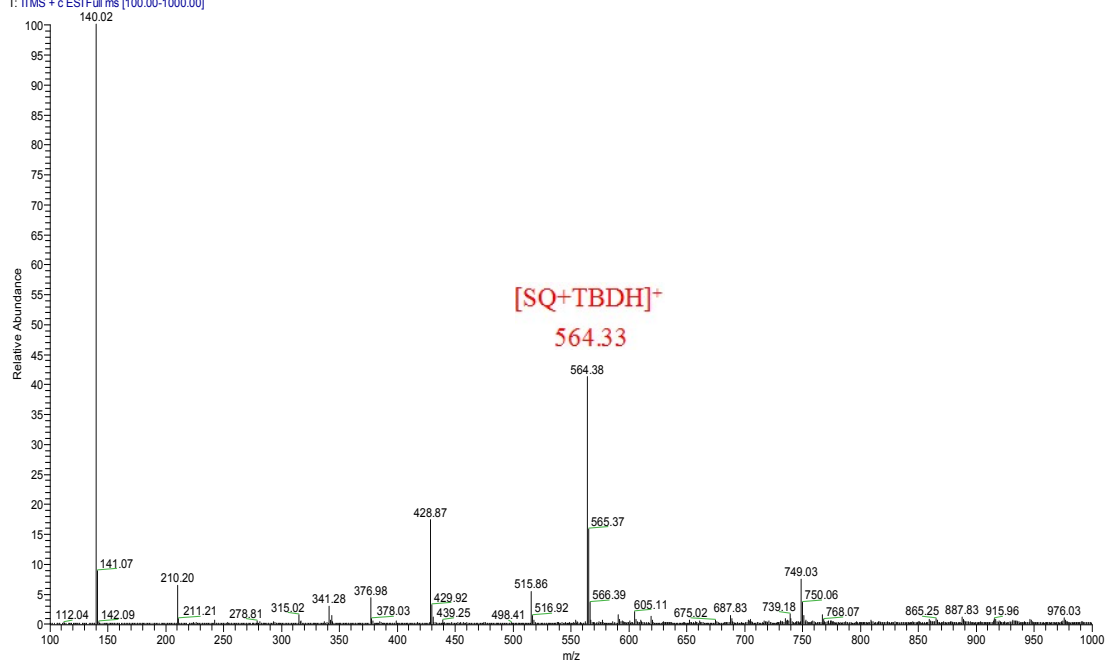

**Fig. S13** The mass spectrometry analysis of **SQM** in MeCN-H<sub>2</sub>O (V : V = 90 : 10) with addition of TBD followed by CO<sub>2</sub> gas in positive mode.



SO<sub>2</sub>OCH<sub>3</sub>+NaOH+CH<sub>3</sub>CN-H<sub>2</sub>O #33-231 RT: 0.12-0.66 AV: 199 NL: 6.49E3  
T: ITMS + c ESI Full ms [100.00-1000.00]

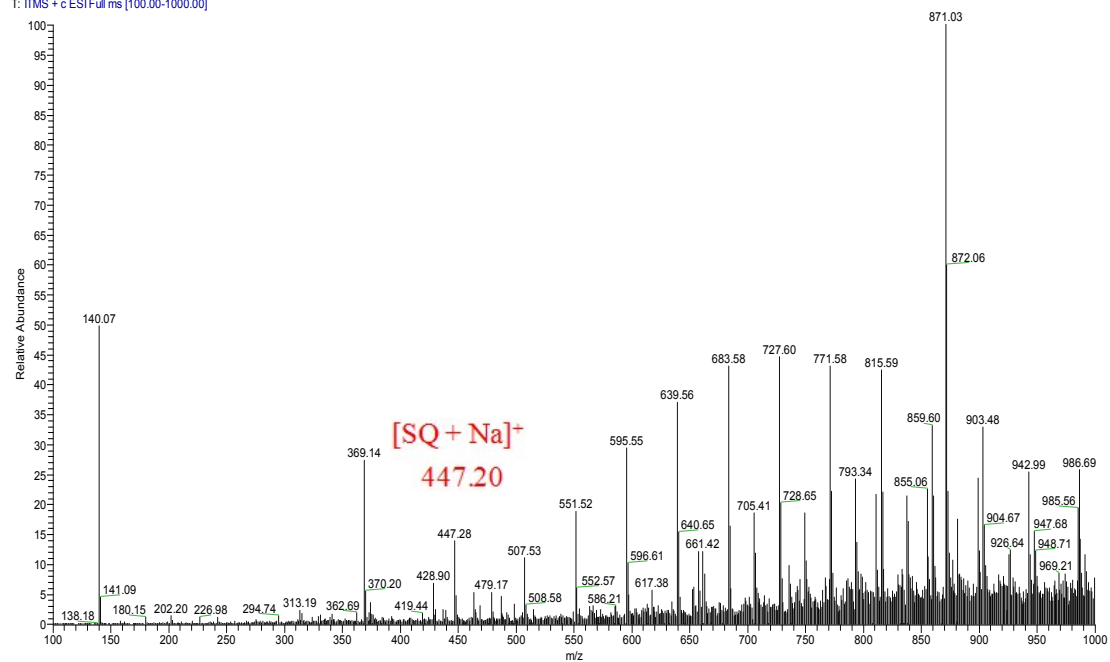

**Fig. S14** The mass spectrometry analysis of **SQM** in MeCN-H<sub>2</sub>O (V : V = 90 : 10)

with addition of NaOH in positive mode.

SQ-OCH3+NaOH+CO2+CH3CN+H2O #50-225 RT: 0.17-0.65 AV: 176 NL: 1.56E4  
T: ITMS + c ESI Full ms [100.00-1000.00]

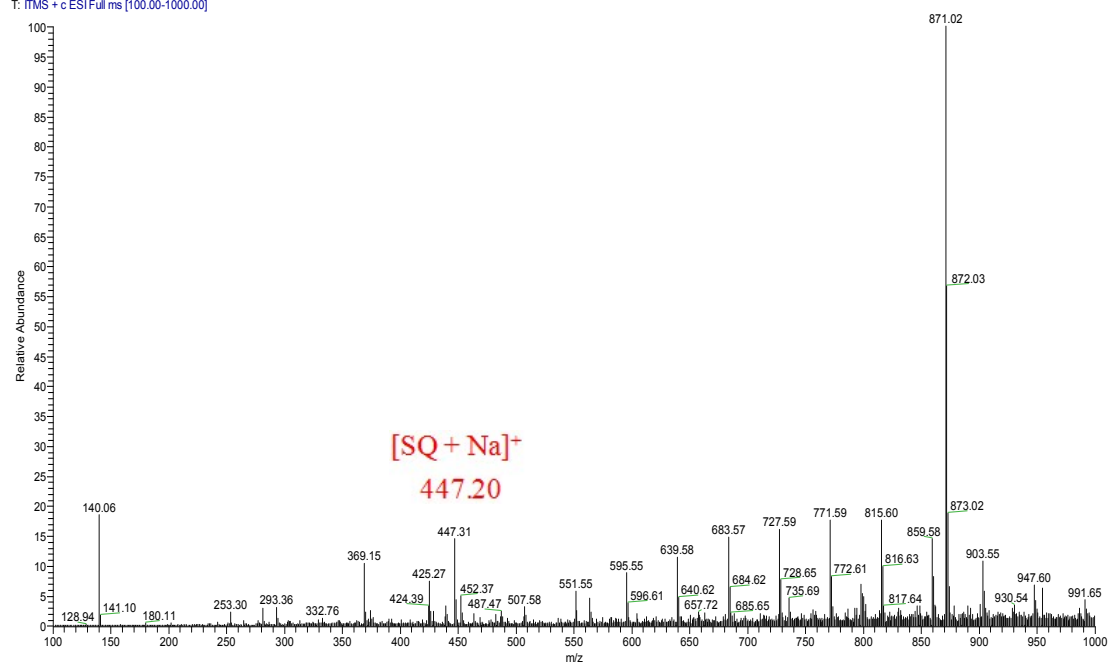

**Fig. S15** The mass spectrometry analysis of **SQM** in MeCN-H<sub>2</sub>O (V : V = 90 : 10) with addition of NaOH followed by bubbling CO<sub>2</sub> gas in positive mode.

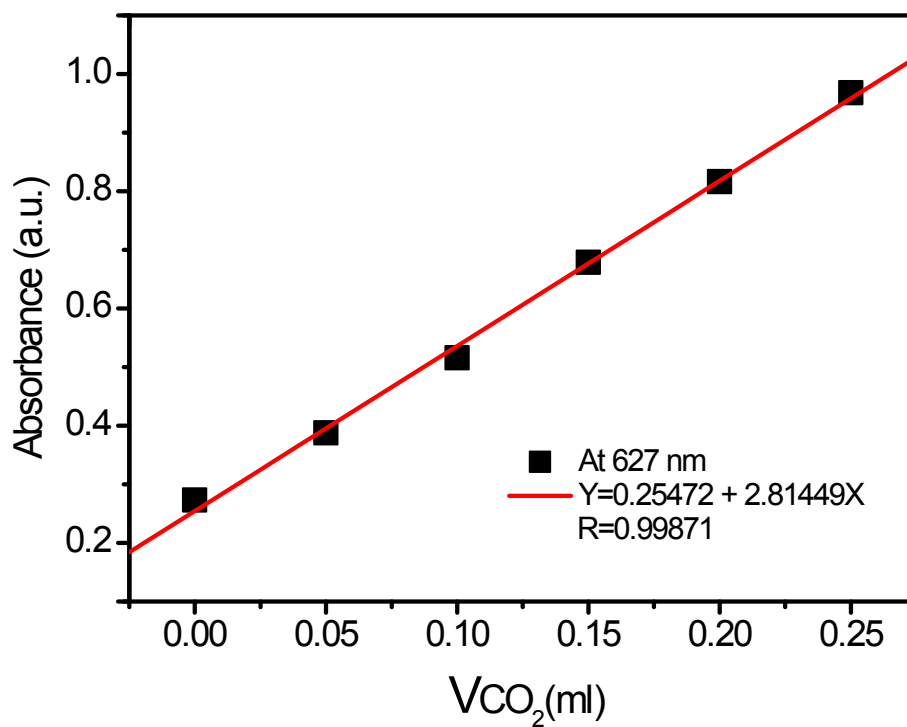

**Fig. S16** The absorbance of **SQM** ( $7.5 \mu\text{M}$ ) at 627 nm with the addition of NaOH (300 eq) versus the volume of pure  $\text{CO}_2$  gas in MeCN- $\text{H}_2\text{O}$  ( $V : V = 90 : 10$ ).

The detection limit in MeCN- $\text{H}_2\text{O}$  ( $V : V = 90 : 10$ ) (3.0 ml) was calculated to be about  $1.20 \cdot 10^{-6} \text{ M}$  (ca. 29.4 ppm, 1 atm,  $25^\circ\text{C}$ )

SQ-OCH<sub>3</sub>+TBD+CH<sub>3</sub>CN+H<sub>2</sub>O-#16 RT: 0.09 AV: 1 NL: 1.23E1  
T: ITMS - c ESI Full ms [100.00-1000.00]

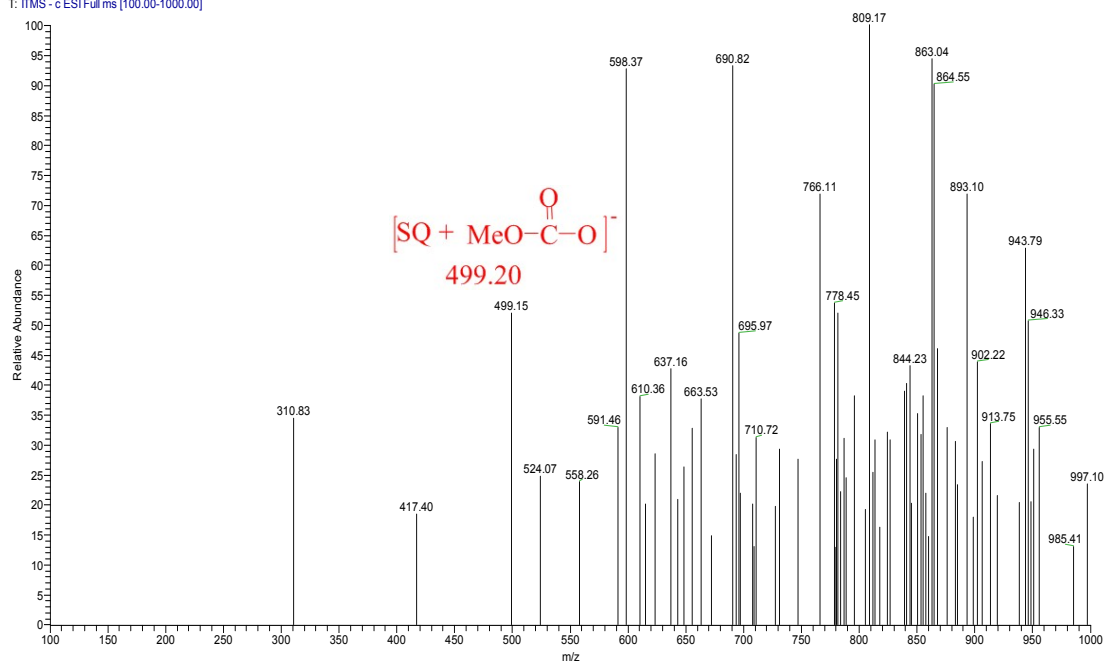

**Fig. S17** The mass spectrometry analysis of **SQM** in MeCN-H<sub>2</sub>O (V : V = 90 : 10)

with addition of TBD followed by CO<sub>2</sub> gas in negative mode.

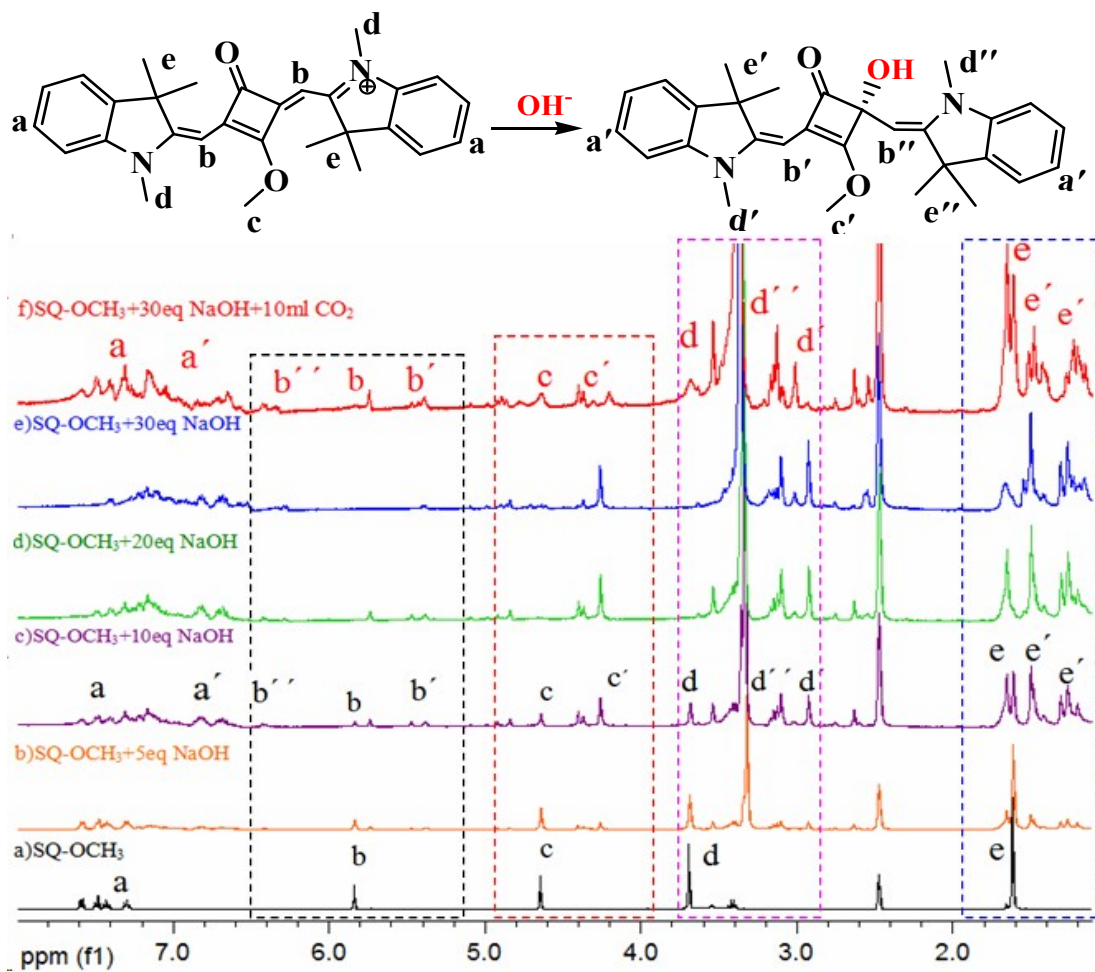

**Fig. S18** Partial  $^1\text{H-NMR}$  spectra obtained during the course of titrating sensor **SQM** (5.0 mM) with NaOH followed by  $\text{CO}_2$  in  $\text{DMSO-}d_6$ .

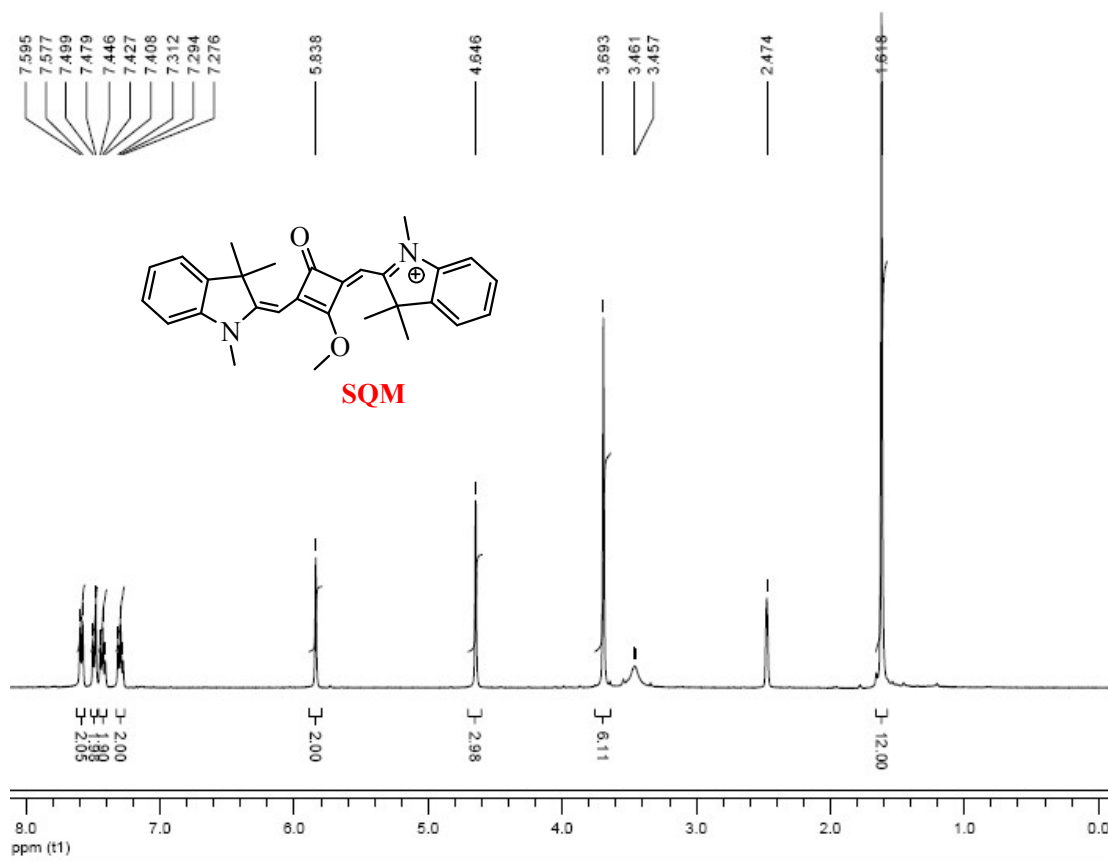

**Fig. S19** <sup>1</sup>H NMR spectrum of SQM

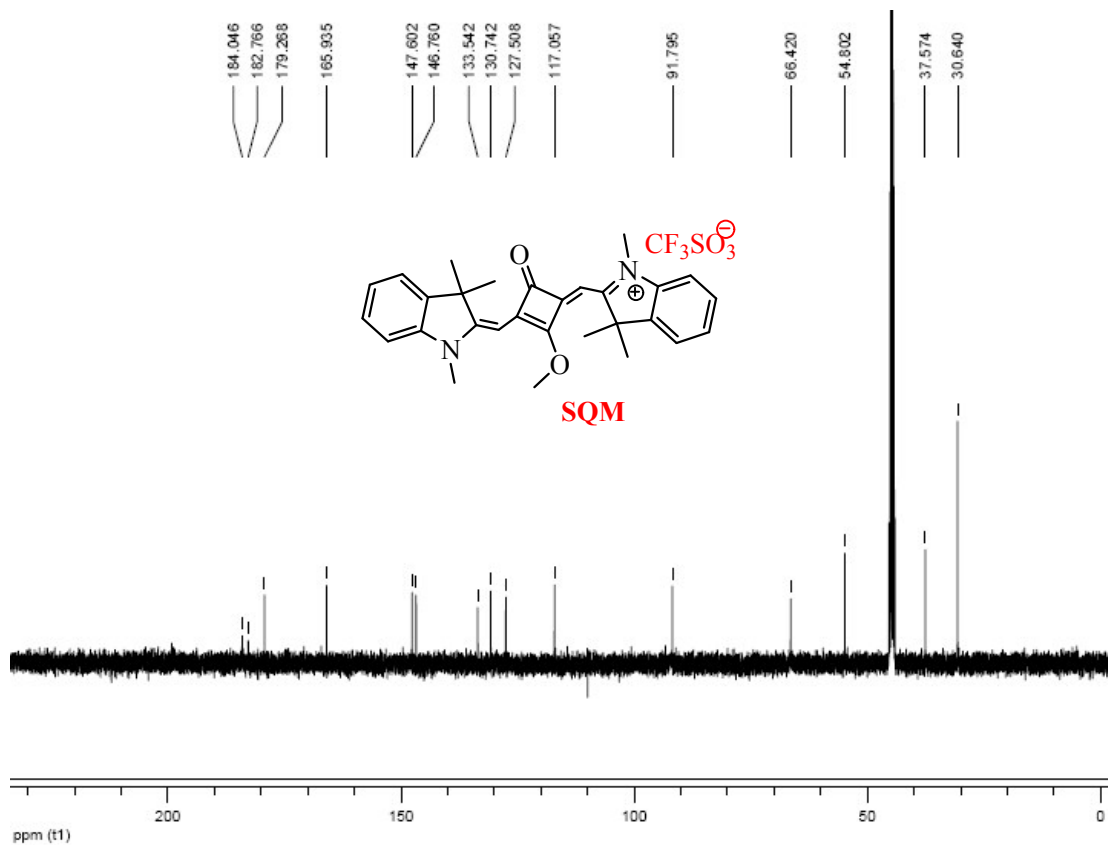

**Fig. 20** <sup>13</sup>C NMR spectrum of SQM

SQ-OCH3 #85-161 RT: 0.25-0.44 AV: 77 NL: 1.27E5  
T: ITMS + c ESI Full ms [200.00-1000.00]

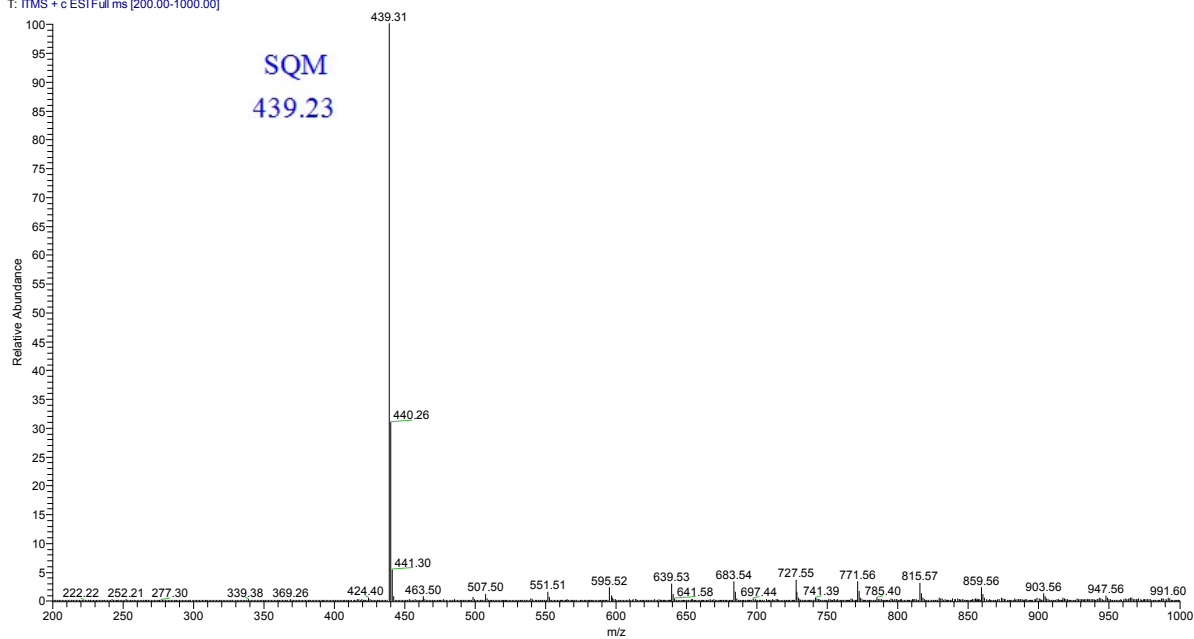

**Fig. 21** The mass spectrometry analysis of SQM in MeCN in positive mode.
